# Supplementary material for: Two cycles of neoadjuvant chemotherapy improves survival in patients with high‐risk upper tract urothelial carcinoma
Source: PubMed Central journal article supplement — BJU Int. 2020 Sep 28;127(3):332–9. doi: 10.1111/bju.15230 (PMC7984033; doi:10.1111/bju.15230), 2020-09-28
Supplement: BJU-127-332-s001.pdf [file BJU-127-332-s001.pdf]

**Supplementary figure S1. Patient selection flow diagram, NAC regimen and perioperative renal function**

**A**

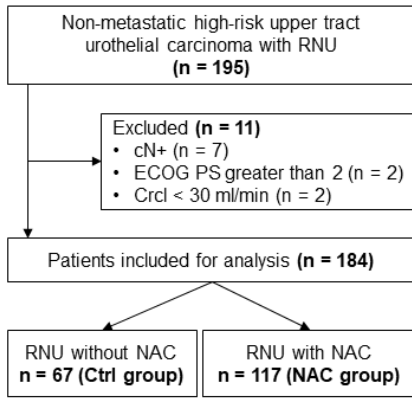

**B**

| No. NAC regimen (%), n = 117 |               |
|------------------------------|---------------|
| MVAC                         | 17 (14.5)     |
| GCis                         | 90 (76.9)     |
| Gcb                          | 10 (8.6)      |
| No. NAC cycles               |               |
| Median ± SD (range)          | 2 ± 0.2 (1-2) |

**C**

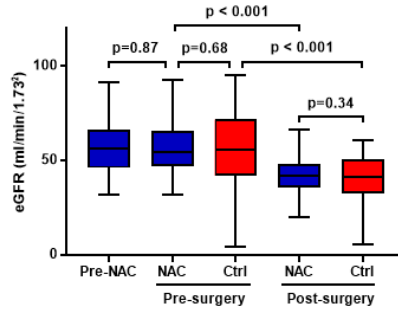

**Figure S2.** Oncological outcomes in subgroup analyses. (A) RFS in patients who received NAC or initial surgery without NAC. (B) RFS in patients with pT3 or higher disease. (C) RFS in patients with pT2 or lower disease.

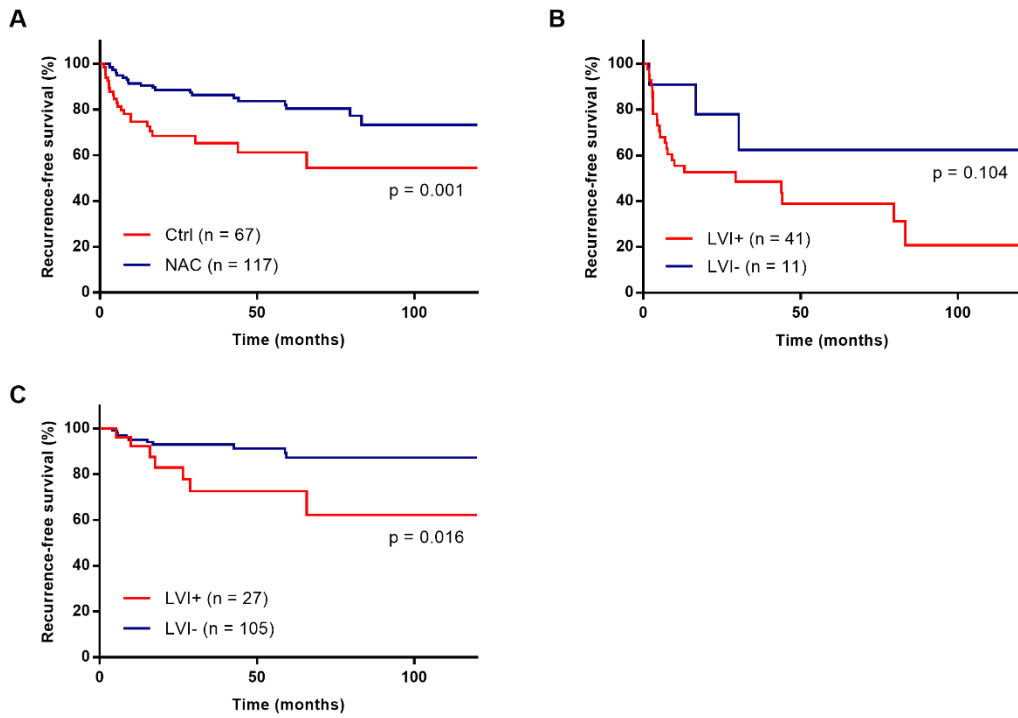

**Supplementary Table S1.** Neoadjuvant chemotherapy related adverse events (CTCAE v4.0)

| Adverse events   | All       | Grade $\geq 3$ |
|------------------|-----------|----------------|
| Neutropenia      | 98 (84%)  | 48 (41%)       |
| Thrombocytopenia | 96 (82%)  | 15 (13%)       |
| Anemia           | 78 (67%)  | 8 (7%)         |
| Nausea           | 88 (75%)  | 0 (0%)         |
| Skin rash        | 7 (6%)    | 1 (0.8%)       |
| Cre increased    | 10 (8.5%) | 0 (0%)         |
| Oral ulcer       | 3 (5.9%)  | 0 (0%)         |
| Others           | 8 (6.8%)  | 0 (0%)         |

**Supplementary Table S2. Patient characteristics**

| Characteristic                               | Total (n = 184) | Ctrl (n = 67) | NAC (n = 117) | P value |
|----------------------------------------------|-----------------|---------------|---------------|---------|
| Age (Median, IQR), y                         | 72 (65-77)      | 73 (65-79)    | 71 (65-77)    | 0.182   |
| Sex, n (%)                                   |                 |               |               |         |
| Male                                         | 136 (73.9)      | 46 (68.7)     | 90 (76.9)     | 0.227   |
| Female                                       | 48 (26.1)       | 21 (31.3)     | 27 (23.1)     |         |
| Time frame of recruitment, n (%)             |                 |               |               |         |
| 2005–2009                                    | 38              | 13 (19.4)     | 25 (21.4)     | 0.347   |
| 2010–2014                                    | 67              | 23 (34.3)     | 44 (37.6)     |         |
| 2015–2019                                    | 79              | 31 (46.3)     | 48 (41.0)     |         |
| ECOG PS, n (%)                               |                 |               |               |         |
| 0                                            | 172 (93.5)      | 62 (92.5)     | 110 (94.0)    | 0.562   |
| 1                                            | 12 (6.5)        | 5 (7.5)       | 7 (6.0)       |         |
| Tumor location, n (%)                        |                 |               |               |         |
| Renal pelvis                                 | 81 (44.0)       | 29 (43.3)     | 52 (44.4)     | 0.619   |
| Ureter                                       | 113 (56.0)      | 38 (56.7)     | 65 (55.6)     |         |
| Hydronephrosis, n (%)                        |                 |               |               |         |
| No                                           | 77 (41.8)       | 33 (49.3)     | 44 (37.6)     | 0.162   |
| Yes                                          | 107 (58.2)      | 34 (50.7)     | 73 (62.4)     |         |
| History of bladder cancer, n (%)             |                 |               |               |         |
| No                                           | 138 (75.0)      | 49 (73.1)     | 89 (76.1)     | 0.724   |
| Yes                                          | 46 (25.0)       | 18 (26.9)     | 28 (23.9)     |         |
| Multifocality, n (%)                         |                 |               |               |         |
| No                                           | 123 (66.8)      | 43 (64.2)     | 80 (68.4)     | 0.237   |
| Yes                                          | 68 (33.2)       | 31 (35.8)     | 37 (31.6)     |         |
| Surgical approach, n (%)                     |                 |               |               |         |
| Open                                         | 23 (12.5)       | 9 (13.4)      | 14 (11.9)     | 0.819   |
| Laparoscopic                                 | 161 (87.5)      | 58 (86.6)     | 103 (88.1)    |         |
| eGFR (ml/min/1.73m <sup>2</sup> ), mean ± SD |                 |               |               |         |
| Before NAC                                   |                 |               | 57.4 ± 14.3   |         |
| Before surgery                               | 56.8 ± 16.3     | 56.1 ± 19.7   | 57.1 ± 14.1   | 0.728   |
| After surgery                                | 41.7 ± 10.3     | 40.7 ± 11.7   | 42.3 ± 9.5    | 0.656   |
| AC, n (%)                                    |                 |               |               |         |
| No                                           | 156 (84.8)      | 55 (82.1)     | 101 (86.3)    | 0.523   |
| Yes                                          | 28 (15.2)       | 12 (17.9)     | 16 (13.7)     |         |

ECOG PS, Eastern Cooperative Oncology Group performance status; NAC, neoadjuvant chemotherapy; AC, adjuvant chemotherapy.

**Supplementary Table S3.** Cox proportional hazard regression models for recurrence free survival

| Variable         | Univariate          |          | Multivariate        |          | Multivariate (IPTW model) |          |
|------------------|---------------------|----------|---------------------|----------|---------------------------|----------|
|                  | HR (95% CI)         | <i>P</i> | HR (95% CI)         | <i>P</i> | HR (95% CI)               | <i>P</i> |
| Age              | 1.020 (0.986-1.054) | 0.249    |                     |          | 1.016 (0.981-1.053)       | 0.372    |
| Male sex         | 0.940 (0.473-1.866) | 0.860    |                     |          | 1.238 (0.612-2.504)       | 0.553    |
| ECOG PS          |                     |          |                     |          |                           |          |
| 0                | 1 (reference)       |          |                     |          |                           |          |
| 1                | 1.131 (0.349-3.658) | 0.837    |                     |          | 1.128 (0.298-4.266)       | 0.859    |
| Clinical T stage |                     |          |                     |          |                           |          |
| cT1 or lower     | 1 (reference)       |          |                     |          |                           |          |
| cT2              | 1.835 (0.849-3.961) | 0.122    |                     |          | 1.589 (0.648-3.895)       | 0.311    |
| cT3              | 3.858 (1.701-8.750) | 0.001    | 2.996 (1.183-7.588) | 0.020    | 3.716 (1.342-10.29)       | 0.012    |
| Tumor location   |                     |          |                     |          |                           |          |
| Renal pelvis     | 1 (reference)       |          |                     |          |                           |          |
| Ureter           | 1.035 (0.566-1.889) | 0.912    |                     |          | 1.727 (0.863-3.458)       | 0.123    |
| Open approach    | 1.799 (0.833-3.886) | 0.135    |                     |          | 0.954 (0.403-2.256)       | 0.914    |
| LVI+             | 5.161 (2.685-9.917) | <0.001   | 2.343 (1.063-5.164) | 0.034    | 2.771 (1.220-6.293)       | 0.015    |
| pDS              | 0.165 (0.064-0.419) | <0.001   | 0.250 (0.093-0.672) | 0.006    | 0.251 (0.092-0.686)       | 0.007    |
| pCR              | 0.743 (0.102-5.410) | 0.769    |                     |          |                           |          |
| NAC              | 0.373 (0.204-0.682) | 0.001    | 0.415 (0.224-0.769) | 0.005    | 0.475 (0.251-0.896)       | 0.022    |
| AC               | 1.924 (0.745-3.723) | 0.138    |                     |          |                           |          |

*ECOG PS, Eastern Cooperative Oncology Group performance status; LVI, lymphovascular invasion; pDS, pathological downstaging; pCR, pathological complete response; NAC, neoadjuvant chemotherapy; AC, adjuvant chemotherapy.*

**Supplementary Table S4.** Cox proportional hazard regression models for cancer specific survival

| Variable         | Univariate          |          | Multivariate        |          | Multivariate (IPTW model) |          |
|------------------|---------------------|----------|---------------------|----------|---------------------------|----------|
|                  | HR (95% CI)         | <i>P</i> | HR (95% CI)         | <i>P</i> | HR (95% CI)               | <i>P</i> |
| Age              | 1.021 (0.983-1.061) | 0.276    |                     |          | 1.021 (0.976-1.067)       | 0.355    |
| Male sex         | 1.182 (0.513-2.725) | 0.695    |                     |          | 1.860 (0.775-4.464)       | 0.164    |
| ECOG PS          |                     |          |                     |          |                           |          |
| 0                | 1 (reference)       |          |                     |          |                           |          |
| 1                | 0.999 (0.238-4.182) | 0.998    |                     |          | 1.440 (0.271-7.650)       | 0.669    |
| Clinical T stage |                     |          |                     |          |                           |          |
| cT1 or lower     | 1 (reference)       |          |                     |          |                           |          |
| cT2              | 1.411 (0.589-3.380) | 0.440    |                     |          | 0.713 (0.251-2.031)       | 0.527    |
| cT3              | 3.883 (1.622-9.295) | 0.002    | 1.825 (0.674-4.942) | 0.236    | 2.013 (0.622-6.512)       | 0.243    |
| Tumor location   |                     |          |                     |          |                           |          |
| Renal pelvis     | 1 (reference)       |          |                     |          |                           |          |
| Ureter           | 0.844 (0.426-1.670) | 0.626    |                     |          | 1.844 (0.773-4.399)       | 0.167    |
| Open approach    | 1.963 (0.975-4.250) | 0.097    |                     |          | 1.433 (0.548-3.747)       | 0.462    |
| LVI+             | 8.123 (3.514-18.78) | <0.001   | 4.782 (1.746-13.10) | 0.002    | 6.723 (2.224-20.32)       | <0.001   |
| pDS              | 0.137 (0.042-0.449) | <0.001   | 0.280 (0.081-0.874) | 0.035    | 0.310 (0.087-0.951)       | 0.044    |
| pCR              | 0.969 (0.131-7.161) | 0.976    |                     |          |                           |          |
| NAC              | 0.375 (0.189-0.746) | 0.005    | 0.495 (0.246-0.897) | 0.038    | 0.505 (0.276-0.953)       | 0.045    |
| AC               | 1.823 (0.851-3.101) | 0.119    |                     |          |                           |          |

*ECOG PS*, Eastern Cooperative Oncology Group performance status; *LVI*, lymphovascular invasion; *pDS*, pathological downstaging; *pCR*, pathological complete response; *NAC*, neoadjuvant chemotherapy; *AC*, adjuvant chemotherapy.

**Supplementary Table S5.** Association of LVI with pathological characteristics

| Characteristic                  | Total (n = 184) | LVI- (n = 116) | LVI+ (n = 68) | <i>P</i> value |
|---------------------------------|-----------------|----------------|---------------|----------------|
| Pathological T stage, n (%)     |                 |                |               |                |
| pT0                             | 5 (2.7)         | 5 (100)        | 0 (0)         | <0.001         |
| pTis/a                          | 35 (19.0)       | 34 (97.2)      | 1 (2.8)       |                |
| pT1                             | 56 (30.4)       | 50 (89.3)      | 6 (10.7)      |                |
| pT2                             | 36 (19.6)       | 16 (44.4)      | 20 (55.6)     |                |
| pT3                             | 45 (24.5)       | 11 (24.4)      | 34 (75.6)     |                |
| pT4                             | 7 (3.8)         | 0 (0)          | 7 (100)       |                |
| Pathological N stage, n (%)     |                 |                |               |                |
| pN0 or Nx                       | 176 (95.6)      | 114 (64.8)     | 62 (35.2)     | 0.053          |
| pN1                             | 8 (4.4)         | 1 (12.5)       | 7 (87.5)      |                |
| Pathological downstaging, n (%) |                 |                |               |                |
| No                              | 113 (61.4)      | 55 (48.7)      | 58 (51.3)     | 0.006          |
| Yes                             | 71 (38.6)       | 61 (85.9)      | 10 (14.1)     |                |
